# Supplementary material for: HCAR Is a Limitation Factor for Chlorophyll Cycle and Chlorophyll b Degradation in Chlorophyll-b-Overproducing Plants
Source: PubMed Central journal article supplement (PMC7762049; doi:10.3390/biom10121639), 2020-12-05
Supplement: biomolecules-10-01639-s001.pdf [file biomolecules-10-01639-s001.pdf]

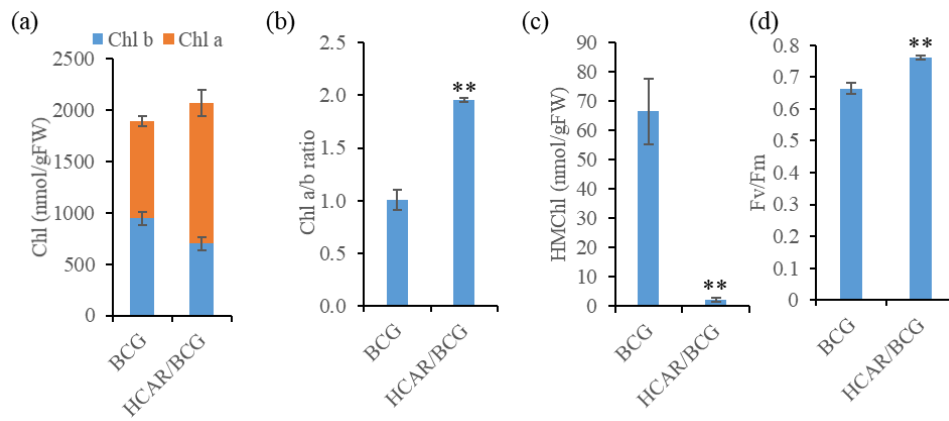

**Figure S1.** The changes of Chl and Chl fluorescence parameters upon overexpressing HCAR in BCG. (a) Chl *a* and *b* contents, (b) Chl *a/b* ratios, (c) HMChl *a* contents and (d) Fv/Fm ratios of BCG and HCAR/BCG plants. Values represent the mean of three replicate samples  $\pm$  SD. Asterisks indicate significant difference compared to BCG (Student's *t*-test, \*\*  $p < 0.01$ ).

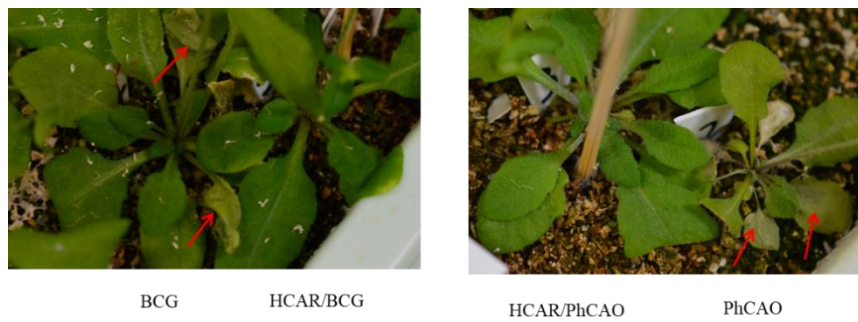

**Figure S2.** The non-programmed cell death (non-PCD) symptoms of BCG and PhCAO were alleviated by overexpressing HCAR. Plants were grown under long-day conditions for 7 weeks. Red arrows indicate the non-PCD symptoms of old leaves.
